# Supplementary material
Source: HighWire-hosted journal article supplement (https://www.cmajopen.ca/highwire/filestream/85476/field_highwire_adjunct_files/0/2020-0181-1-at.pdf)
Supplement: 2020-0181-1-at.pdf [file 2020-0181-1-at.pdf]

## Appendix 1

Figure S1: Educational distribution of our study sample compared to the distribution of maternal education in the All Our Babies pregnancy cohort from Calgary, Alberta in 2008-2010.<sup>ref. 1</sup>

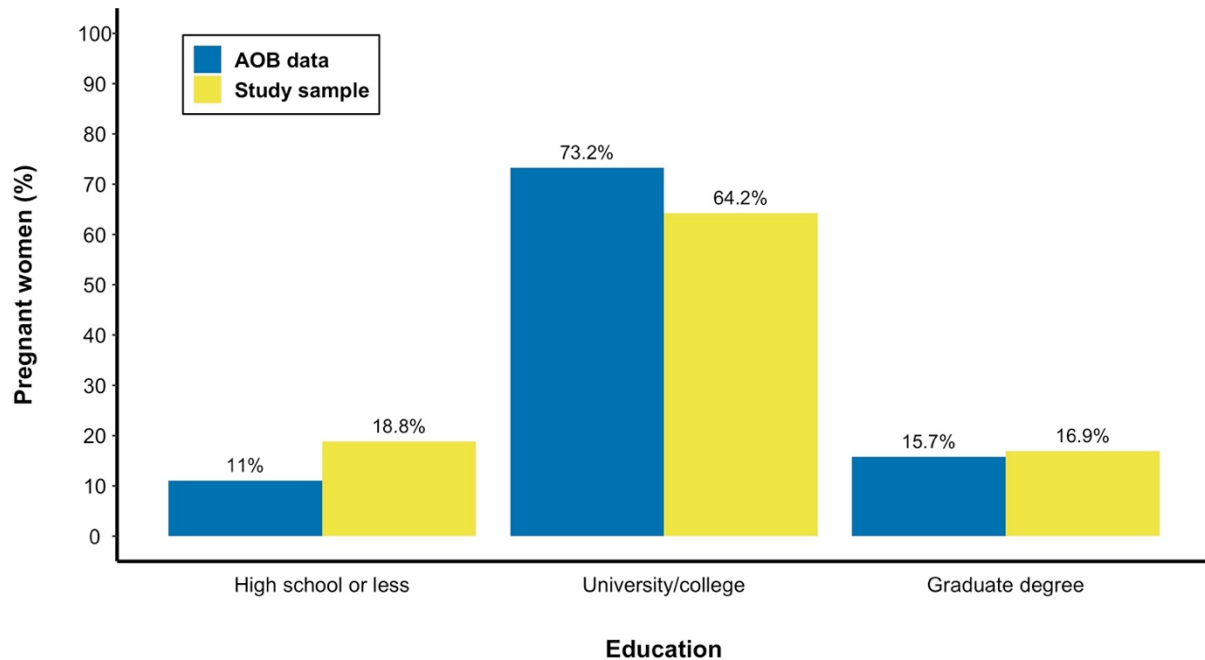

Figure S2: Income distribution of our study sample compared to the distribution of maternal income in the All Our Babies pregnancy cohort from Calgary, Alberta in 2008-2010.<sup>ref. 1</sup>

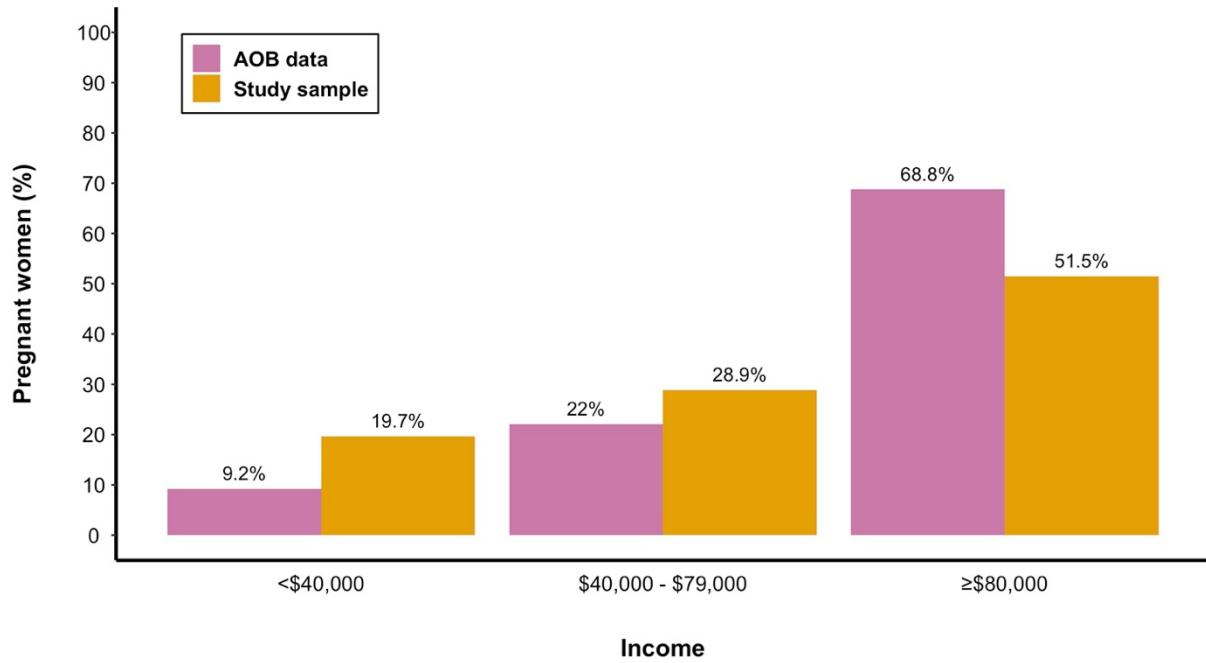

Figure S3: Age distribution of our study sample compared to the distribution of maternal age at birth in the Better Outcomes Registry and Network (BORN) from Ontario in 2016-2017.<sup>ref. 2</sup>

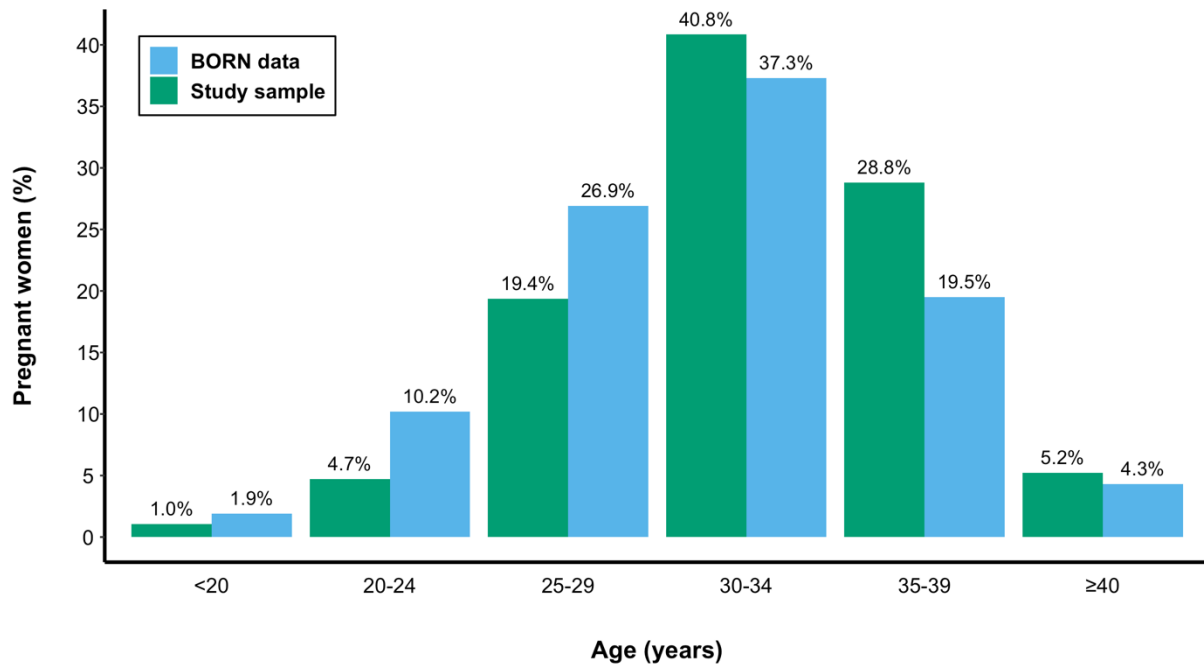

## References

- ref. 1. McDonald SW, Lyon AW, Benzies KM, et al. The All Our Babies pregnancy cohort: design, methods, and participant characteristics. *BMC Pregnancy Childbirth* 2013;13 Suppl 1(Suppl 1):S2.
- ref. 2. *One in a million. BORN Ontario biennial report: 2016-2018*. Ottawa: BORN Ontario; 2018.
